# Supplementary material for: A green adsorbent derived from banana peel for highly effective removal of heavy metal ions from water
Source: Royal Society of Chemistry journal article supplement (doi:10.1039/c6ra07460j), 2016-01-01
Supplement: c6ra07460j1.pdf [file c6ra07460j1.pdf]

## Supporting Information

### **A green adsorbent derived from banana peel for highly effective removal of heavy metal ions from water**

Yingchun Li<sup>a,b,\*</sup> Jiang Liu<sup>a</sup> Qunhui Yuan<sup>c</sup> Hui Tang<sup>a</sup> Feng Yu<sup>b,\*</sup> Xin Lv<sup>d,\*</sup>

<sup>a</sup> *Key Laboratory of Xinjiang Endemic Phytomedicine Resources, Ministry of Education; School of Pharmacy, Shihezi University, Shihezi, 832000, China*

<sup>b</sup> *Key Laboratory for Green Processing of Chemical Engineering of Xinjiang Bingtuan, School of Chemistry and Chemical Engineering, Shihezi University, Shihezi 832003, China*

<sup>c</sup> *School of Materials Science and Engineering, Harbin Institute of Technology (Shenzhen), Shenzhen 518055, China.*

<sup>d</sup> *Key Laboratory of Oasis Eco-agriculture, Xinjiang Production and Construction Corps, School of Agriculture, Shihezi University, Shihezi 832003, China*

\*Corresponding authors

Yingchun Li<sup>a,b,\*</sup>, Feng Yu<sup>b,\*</sup>, Xin Lv<sup>d,\*</sup>

E-mail: yingchunli@shzu.edu.cn, yufeng05@mail.ipc.ac.cn, lxshz@126.com

Tel/Fax: +86-993-2057005, 0993-2033352

**Table S1** Adsorption isotherm models.

| Adsorption isotherm equations |                                     | Symbol definition                                 |
|-------------------------------|-------------------------------------|---------------------------------------------------|
| Langmuir                      | $Q_e = (K_L Q_m C_e)/(1 + K_L C_e)$ | $Q_e$ – adsorption capacity at equilibrium (mg/g) |
| Freundlich                    | $Q_e = K_F C_e^{1/n}$               | $Q_m$ – maximum adsorption capacity (mg/g)        |
|                               |                                     | $C_e$ – equilibrium concentration (mg/L)          |
|                               |                                     | $K_L$ – Langmuir adsorption constant (L/mg)       |
|                               |                                     | $K_F$ – Freundlich adsorption capacity (mg/g)     |
|                               |                                     | n – Freundlich dimensionless constant             |

**Table S2** Adsorption kinetic models.

| Adsorption kinetic equations                                    | Symbol definition                                                                                                                       |
|-----------------------------------------------------------------|-----------------------------------------------------------------------------------------------------------------------------------------|
| Pseudo-first order $\log(Q_e - Q_t) = \log Q_e - (k_1 t)/2.303$ | $Q_e$ and $Q_t$ – adsorption capacity at equilibrium<br>and at time $t$ (mg/g)                                                          |
| Pseudo-second order $t/Q_t = 1/(k_2 Q_e^2) + t/Q_e$             | $k_1$ –first order rate constant( $\text{min}^{-1}$ )<br>$k_2$ –second order rate constant ( $\text{kg}/\text{mmol} \cdot \text{min}$ ) |
